# Supplementary material
Source: Springer Nature journal article supplement (https://www.springermedizin.de/resource/supplementary/12885_2010_2536_MOESM3_ESM.pdf/9462426)

**a**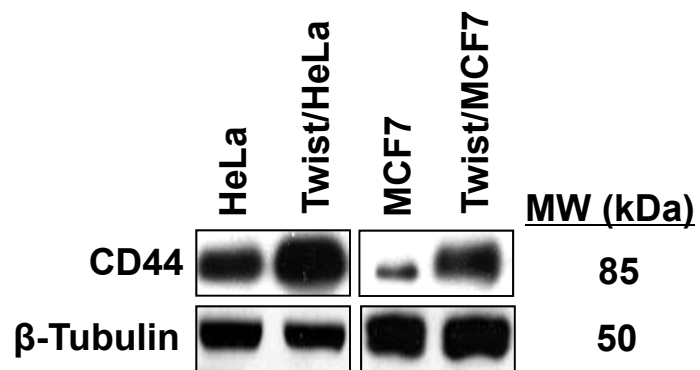**b**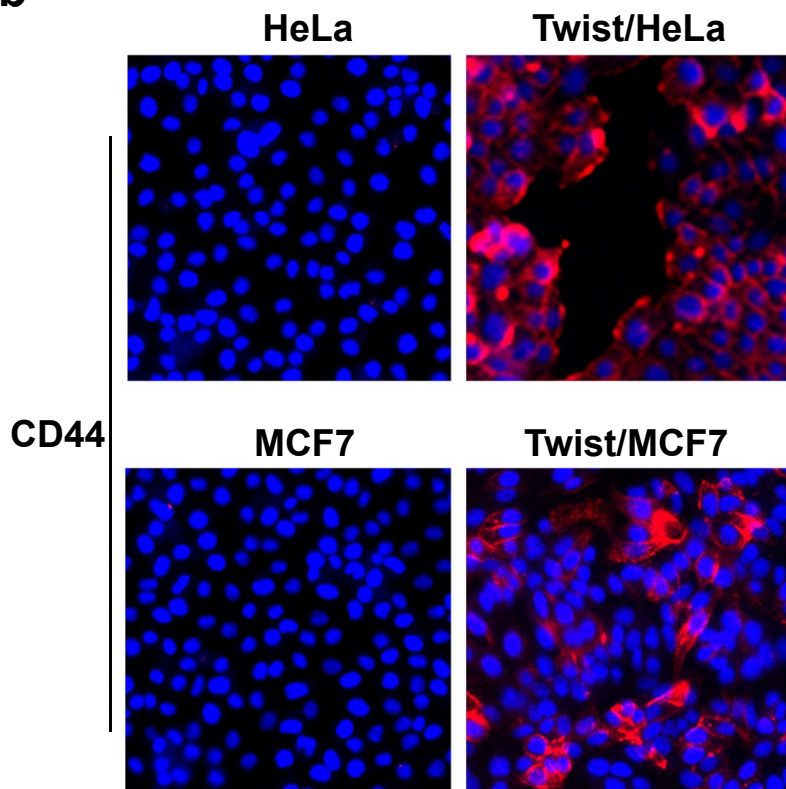**c**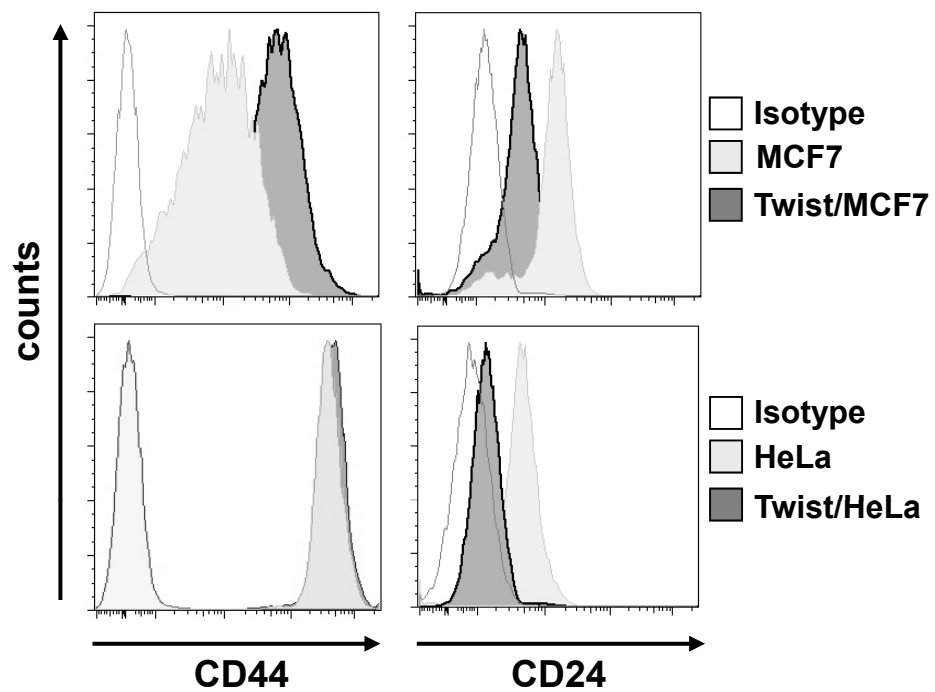**d**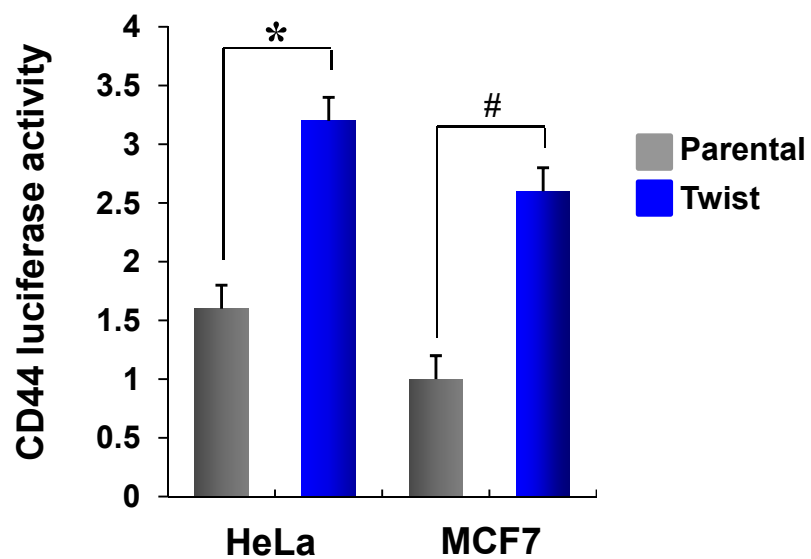

Supplement: MOESM3 [file 9462426]
